# Supplementary material for: Impact of heteroresistance on treatment outcomes of people with drug-resistant TB
Source: PubMed Central journal article supplement (PMC11467852; doi:10.5588/ijtldopen.24.0343), 2024-10-01
Supplement: ijtldopen24-0343_SupplementalData1.pdf [file ijtldopen24-0343_SupplementalData1.pdf]

# Impact of heteroresistance on treatment outcomes of people with drug-resistant TB

## Supplementary Data

|                                                                                                                                    |    |
|------------------------------------------------------------------------------------------------------------------------------------|----|
| Table S1. Mutation pattern in each of 624 MTB isolates.....                                                                        | 2  |
| Table S2. Frequency of mutations per drug class.....                                                                               | 4  |
| Table S3. Clinical and demographic characteristics of 379 patients treated for MDR TB in the Philippines, 2013-2016.....           | 6  |
| Table S4. Clinical and demographic characteristics of 140 patients treated for MDR plus SLIR TB in the Philippines, 2013-2016..... | 7  |
| Table S5. Clinical and demographic characteristics of 105 patients treated for Pre-XDR TB in the Philippines, 2013-2016.....       | 8  |
| Table S6. Distribution of degree of heteroresistance based on the phenotypic susceptibility test.....                              | 9  |
| Figure S1. Frequency of heteroresistance by drug class/target.....                                                                 | 9  |
| Table S7. Hazard of unfavorable outcome associated with heteroresistance in multiple imputation analysis.....                      | 10 |

**Table S1. Mutation pattern in each of 624 MTB isolates**

| <b>Mutation</b>                                                                       | <b>Resistant<br/>n (%)</b> | <b>Susceptible<br/>n (%)</b> |
|---------------------------------------------------------------------------------------|----------------------------|------------------------------|
| <b>Isoniazid (615 resistant MTB isolates with valid data)</b>                         |                            |                              |
| <b>katGS315T</b>                                                                      | 360 (58.5)                 |                              |
| <b>inhAc-15t</b>                                                                      | 159 (25.9)                 |                              |
| <b>inhAc-15t, katGS315T</b>                                                           | 37 (6.0)                   |                              |
| <b>katGS315N</b>                                                                      | 16 (2.6)                   |                              |
| <b>inhA KS315N</b>                                                                    | 1 (0.2)                    |                              |
| <b>No mutation</b>                                                                    | 42 (6.8)                   |                              |
| <b>Rifampicin (624 resistant MTB isolates), All mutations in the <i>rpoB</i> gene</b> |                            |                              |
| <b>S531L</b>                                                                          | 375 (60.1)                 |                              |
| <b>S531L H526Y</b>                                                                    | 3 (0.5)                    |                              |
| <b>S531L S531F</b>                                                                    | 2 (0.3)                    |                              |
| <b>S531L H526L</b>                                                                    | 2 (0.3)                    |                              |
| <b>S531L H526D</b>                                                                    | 2 (0.3)                    |                              |
| <b>S531L D516V</b>                                                                    | 2 (0.3)                    |                              |
| <b>S531L S531W</b>                                                                    | 1 (0.2)                    |                              |
| <b>S531L S522Q</b>                                                                    | 1 (0.2)                    |                              |
| <b>S531L S522L</b>                                                                    | 1 (0.2)                    |                              |
| <b>S531L L533P</b>                                                                    | 1 (0.2)                    |                              |
| <b>S531L H526Y D516Y L533P</b>                                                        | 1 (0.2)                    |                              |
| <b>S531L H526R L533P</b>                                                              | 1 (0.2)                    |                              |
| <b>H526Y</b>                                                                          | 58 (9.3)                   |                              |
| <b>H526Y H526C H526R</b>                                                              | 1 (0.2)                    |                              |
| <b>H526Y H526R</b>                                                                    | 1 (0.2)                    |                              |
| <b>H526R</b>                                                                          | 23 (3.7)                   |                              |
| <b>H526R L533P</b>                                                                    | 1 (0.2)                    |                              |
| <b>H526D</b>                                                                          | 23 (3.7)                   |                              |
| <b>H526D Q513K</b>                                                                    | 4 (0.6)                    |                              |
| <b>S531W</b>                                                                          | 19 (3.0)                   |                              |
| <b>D516V</b>                                                                          | 19 (3.0)                   |                              |
| <b>H526C</b>                                                                          | 14 (2.2)                   |                              |
| <b>L533P</b>                                                                          | 11 (1.8)                   |                              |
| <b>H526L</b>                                                                          | 8 (1.3)                    |                              |
| <b>H526L D516V</b>                                                                    | 1 (0.2)                    |                              |
| <b>D516Y</b>                                                                          | 8 (1.3)                    |                              |
| <b>S522L</b>                                                                          | 8 (1.3)                    |                              |
| <b>Q513P</b>                                                                          | 3 (0.5)                    |                              |

|                                                                                                                                     |            |            |
|-------------------------------------------------------------------------------------------------------------------------------------|------------|------------|
| <b>D516F</b>                                                                                                                        | 3 (0.5)    |            |
| <b>Q513L</b>                                                                                                                        | 2 (0.3)    |            |
| <b>S531F</b>                                                                                                                        | 1 (0.2)    |            |
| <b>S531F D516V</b>                                                                                                                  | 1 (0.2)    |            |
| <b>Q513K</b>                                                                                                                        | 1 (0.2)    |            |
| <b>No mutation</b>                                                                                                                  | 22 (3.5)   |            |
| <b>Fluoroquinolones</b> (105 resistant, 502 susceptible MTB isolates with valid data). All mutations in the <i>gyrA</i> gene.       |            |            |
| <b>D94G</b>                                                                                                                         | 26 (24.8)  | 1 (0.2)    |
| <b>D94G A90V</b>                                                                                                                    | 3 (2.9)    |            |
| <b>D94G A90V D94N</b>                                                                                                               | 3 (2.9)    |            |
| <b>D94G A90V D94A</b>                                                                                                               | 2 (1.9)    |            |
| <b>D94G A90V D94H</b>                                                                                                               | 2 (1.9)    |            |
| <b>D94G D94A</b>                                                                                                                    | 2 (1.9)    |            |
| <b>D94G D94H D94Y</b>                                                                                                               | 1 (1.0)    |            |
| <b>D94G D94N</b>                                                                                                                    | 1 (1.0)    |            |
| <b>D94G A90V S91P D94A D94H</b>                                                                                                     |            |            |
| <b>D94N D94Y</b>                                                                                                                    | 1 (1.0)    |            |
| <b>D94G A90V S91P</b>                                                                                                               | 1 (1.0)    |            |
| <b>D94G G88C A90V S91P</b>                                                                                                          | 1 (1.0)    |            |
| <b>D94G S91P</b>                                                                                                                    | 1 (1.0)    |            |
| <b>A90V</b>                                                                                                                         | 22 (21.0)  | 2 (0.4)    |
| <b>A90V S91P</b>                                                                                                                    | 2 (1.9)    |            |
| <b>A90V D94A</b>                                                                                                                    | 1 (1.0)    |            |
| <b>D94A</b>                                                                                                                         | 7 (6.7)    |            |
| <b>D94N</b>                                                                                                                         | 7 (6.7)    |            |
| <b>D94Y</b>                                                                                                                         | 5 (4.8)    |            |
| <b>D94H</b>                                                                                                                         | 2 (1.9)    |            |
| <b>S91P</b>                                                                                                                         | 1 (1.0)    |            |
| <b>No mutation</b>                                                                                                                  | 14 (13.3)  | 499 (99.4) |
| <b>Second-line Injectables</b> (134 resistant, 490 susceptible MTB isolates with valid data). All mutations in the <i>rrs</i> gene. |            |            |
| <b>1401G</b>                                                                                                                        | 106 (79.1) | 5 (1.0)    |
| <b>1484T</b>                                                                                                                        | 0 (0.0)    | 1 (0.2)    |
| <b>No mutation</b>                                                                                                                  | 28 (20.9)  | 484 (98.8) |
| <b>Streptomycin</b> (293 resistant, 301 susceptible MTB isolates with valid data). All mutations in the <i>rrs</i> gene.            |            |            |
| <b>A514C</b>                                                                                                                        | 123 (42.1) | 7 (2.3)    |
| <b>C517T</b>                                                                                                                        | 9 (3.1)    | 2 (0.7)    |
| <b>No mutation</b>                                                                                                                  | 161 (54.9) | 292 (97.0) |

**Table S2. Frequency of mutations per drug class**

| <b>Mutation</b>                                                                                    | <b>Resistant<br/>n (%)</b> | <b>Susceptible<br/>n (%)</b> |
|----------------------------------------------------------------------------------------------------|----------------------------|------------------------------|
| <b>Isoniazid</b> (611 mutations among INH resistant MTB)                                           |                            |                              |
| <b>katGS315T</b>                                                                                   | 397 (65.0)                 |                              |
| <b>inhAc-15t</b>                                                                                   | 197 (32.2)                 |                              |
| <b>katGS315N</b>                                                                                   | 17 (2.8)                   |                              |
| <b>Rifampicin</b> (632 mutations among RIF resistant MTB, 26 isolates had more than one mutation)  |                            |                              |
| <b>S531L</b>                                                                                       | 392 (62.0)                 |                              |
| <b>H526Y</b>                                                                                       | 64 (10.1)                  |                              |
| <b>H526D</b>                                                                                       | 29 (4.6)                   |                              |
| <b>H526R</b>                                                                                       | 27 (4.3)                   |                              |
| <b>D516V</b>                                                                                       | 23 (3.6)                   |                              |
| <b>S531W</b>                                                                                       | 20 (3.2)                   |                              |
| <b>H526C</b>                                                                                       | 15 (2.4)                   |                              |
| <b>L533P</b>                                                                                       | 15 (2.4)                   |                              |
| <b>H526L</b>                                                                                       | 11 (1.7)                   |                              |
| <b>D516Y</b>                                                                                       | 9 (1.4)                    |                              |
| <b>S522L</b>                                                                                       | 9 (1.4)                    |                              |
| <b>Q513K</b>                                                                                       | 5 (0.8)                    |                              |
| <b>S531F</b>                                                                                       | 4 (0.6)                    |                              |
| <b>D516F</b>                                                                                       | 3 (0.5)                    |                              |
| <b>Q513P</b>                                                                                       | 3 (0.5)                    |                              |
| <b>Q513L</b>                                                                                       | 2 (0.3)                    |                              |
| <b>S522Q</b>                                                                                       | 1 (0.2)                    |                              |
| <b>Fluoroquinolones</b> (128 mutations among FQ resistant and 3 among FQ susceptible MTB)          |                            |                              |
| <b>D94G</b>                                                                                        | 44 (34.4)                  | 1 (33.3)                     |
| <b>A90V</b>                                                                                        | 38 (29.7)                  | 2 (66.6)                     |
| <b>D94A</b>                                                                                        | 13 (10.2)                  |                              |
| <b>D94N</b>                                                                                        | 12 (9.4)                   |                              |
| <b>D94Y</b>                                                                                        | 7 (5.5)                    |                              |
| <b>S91P</b>                                                                                        | 7 (5.5)                    |                              |
| <b>D94H</b>                                                                                        | 6 (4.7)                    |                              |
| <b>G88C</b>                                                                                        | 1 (0.8)                    |                              |
| <b>Second-line Injectables</b> (106 mutations among SLI resistant and 6 among SLI susceptible MTB) |                            |                              |
| <b>1401G</b>                                                                                       | 106 (100.0)                | 5 (83.3)                     |
| <b>1484T</b>                                                                                       | 0 (0.0)                    | 1 (16.7)                     |

**Streptomycin** (132 mutations among Streptomycin resistant and 9 among Streptomycin susceptible MTB)

|              |            |          |
|--------------|------------|----------|
| <b>A514C</b> | 123 (93.2) | 7 (77.8) |
| <b>C517T</b> | 9 (6.8)    | 2 (22.2) |

MTB: Mycobacterium tuberculosis

**Table S3. Clinical and demographic characteristics of 379 patients treated for MDR TB in the Philippines, 2013-2016**

|                                                 | Total,<br>N (%)<br>N=379 | Heteroresistance,<br>n (%)<br>n = 13 | No<br>heteroresistance,<br>n (%)<br>n = 366 | p-value* |
|-------------------------------------------------|--------------------------|--------------------------------------|---------------------------------------------|----------|
| <b>Clinical and demographic characteristics</b> |                          |                                      |                                             |          |
| Age, median (IQR)                               | 43 (33-52)               | 52 (42-56)                           | 43 (33-52)                                  | 0.06     |
| Female                                          | 121 (31.9)               | 5 (38.5)                             | 116 (31.7)                                  | 0.61     |
| Body mass index                                 |                          |                                      |                                             |          |
| Normal                                          | 129 (34.0)               | 7 (53.9)                             | 122 (33.3)                                  | 0.48     |
| Underweight                                     | 200 (52.7)               | 5 (38.5)                             | 195 (53.3)                                  |          |
| Overweight                                      | 43 (11.4)                | 1 (7.7)                              | 42 (11.5)                                   |          |
| Obese                                           | 7 (1.9)                  | 0 (0.0)                              | 7 (1.9)                                     |          |
| National Capital Region                         | 112 (29.5)               | 3 (23.1)                             | 109 (29.8)                                  | 0.60     |
| Baseline CXR                                    |                          |                                      |                                             |          |
| Cavitary                                        | 141 (37.2)               | 7 (53.9)                             | 115 (31.4)                                  | 0.23     |
| Non-cavitary                                    | 122 (32.2)               | 3 (23.1)                             | 138 (37.7)                                  |          |
| Unknown                                         | 116 (30.6)               | 3 (23.1)                             | 113 (30.9)                                  |          |
| Smear grade <sup>^</sup>                        |                          |                                      |                                             |          |
| Negative or scanty                              | 94 (24.8)                | 2 (15.4)                             | 92 (25.1)                                   | 0.87     |
| (1+)                                            | 108 (28.5)               | 4 (30.8)                             | 104 (28.4)                                  |          |
| (2+)                                            | 84 (22.2)                | 3 (23.1)                             | 81 (22.1)                                   |          |
| (3+)                                            | 93 (24.5)                | 4 (30.8)                             | 89 (24.3)                                   |          |
| Previous TB treatment                           | 365 (96.3)               | 11 (84.6)                            | 354 (96.7)                                  | 0.02     |
| <b>Heteroresistance</b>                         |                          |                                      |                                             |          |
| Macro (>10%)                                    | 6 (1.6)                  | 6 (46.2)                             | -                                           |          |
| Micro (≤10%)                                    | 2 (0.5)                  | 2 (15.4)                             | -                                           |          |
| Rare                                            | 5 (1.3)                  | 5 (38.5)                             | -                                           |          |
| Heteroresistance to:                            |                          |                                      |                                             |          |
| Fluoroquinolones                                | 2 (0.5)                  | 2 (15.4)                             | -                                           |          |
| Second-line injectables                         | 1 (0.3)                  | 1 (7.7)                              | -                                           |          |
| Isoniazid                                       | 2 (0.5)                  | 2 (15.4)                             | -                                           |          |
| Rifampicin                                      | 7 (1.9)                  | 7 (53.9)                             | -                                           |          |
| Streptomycin                                    | 2 (0.5)                  | 2 (15.4)                             | -                                           |          |
| >1 resistant population                         | 16 (4.2)                 | 2 (15.4)                             | 14 (3.8)                                    | 0.04     |

MDR: Multi-drug resistant, TB: tuberculosis, IQR: interquartile range, CXR: Chest x-ray

\*p-value for the association of clinical factor with heteroresistance, using chi-squared test for categorical variables and the Wilcoxon rank-sum to compare median age

<sup>^</sup>Highest pre-treatment smear grade

**Table S4. Clinical and demographic characteristics of 140 patients treated for MDR plus SLIR TB in the Philippines, 2013-2016**

|                                                 | <b>Total, n (%)<br/>N = 140</b> | <b>Heteroresistance,<br/>n (%)<br/>n = 8</b> | <b>No<br/>heteroresistance,<br/>n (%)<br/>n = 132</b> | <b>p-value*</b> |
|-------------------------------------------------|---------------------------------|----------------------------------------------|-------------------------------------------------------|-----------------|
| <b>Clinical and demographic characteristics</b> |                                 |                                              |                                                       |                 |
| Age, median (IQR)                               | 34 (26-44.5)                    | 34.5 (27-45.5)                               | 34 (26-44.5)                                          | 0.94            |
| Female                                          | 32 (22.9)                       | 0 (0.0)                                      | 32 (24.2)                                             | 0.11            |
| Body mass index                                 |                                 |                                              |                                                       |                 |
| Normal                                          | 52 (37.1)                       | 4 (50.0)                                     | 48 (36.4)                                             | 0.78            |
| Underweight                                     | 77 (55.0)                       | 4 (50.0)                                     | 73 (55.3)                                             |                 |
| Overweight                                      | 10 (7.1)                        | 0 (0.0)                                      | 10 (7.6)                                              |                 |
| Obese                                           | 1 (0.7)                         | 0 (0.0)                                      | 1 (0.8)                                               |                 |
| National Capital Region                         | 102 (72.9)                      | 7 (87.5)                                     | 95 (72.0)                                             | 0.34            |
| Baseline CXR                                    |                                 |                                              |                                                       |                 |
| Cavitary                                        | 18 (12.9)                       | 0 (0.0)                                      | 18 (13.6)                                             | 0.27            |
| Non-cavitary                                    | 36 (25.7)                       | 1 (12.5)                                     | 35 (26.5)                                             |                 |
| Unknown                                         | 86 (61.4)                       | 7 (87.5)                                     | 79 (59.9)                                             |                 |
| Smear grade <sup>^</sup>                        |                                 |                                              |                                                       |                 |
| Negative or scanty                              | 54 (38.6)                       | 3 (37.5)                                     | 51 (38.6)                                             | 0.37            |
| (1+)                                            | 33 (23.6)                       | 4 (50.0)                                     | 29 (22.0)                                             |                 |
| (2+)                                            | 25 (17.9)                       | 0 (0.0)                                      | 25 (18.9)                                             |                 |
| (3+)                                            | 27 (19.3)                       | 1 (12.5)                                     | 26 (19.7)                                             |                 |
| Missing                                         | 1 (0.7)                         | 0 (0.0)                                      | 1 (0.8)                                               |                 |
| Previous TB treatment                           | 117 (83.6)                      | 4 (50.0)                                     | 113 (85.6)                                            | 0.008           |
| <b>Heteroresistance</b>                         |                                 |                                              |                                                       |                 |
| Macro (>10%)                                    | 5 (3.6)                         | 5 (62.5)                                     | -                                                     |                 |
| Micro (≤10%)                                    | 1 (0.7)                         | 1 (12.5)                                     | -                                                     |                 |
| Rare                                            | 2 (1.4)                         | 2 (25.0)                                     | -                                                     |                 |
| Heteroresistance to:                            |                                 |                                              |                                                       |                 |
| Fluoroquinolones                                | 0 (0.0)                         | 0 (0.0)                                      | -                                                     |                 |
| Second-line injectables                         | 6 (4.3)                         | 6 (75.0)                                     | -                                                     |                 |
| Isoniazid                                       | 4 (2.9)                         | 4 (50.0)                                     | -                                                     |                 |
| Rifampicin                                      | 6 (4.3)                         | 6 (75.0)                                     | -                                                     |                 |
| Streptomycin                                    | 4 (2.9)                         | 4 (50.0)                                     | -                                                     |                 |
| >1 resistant population                         | 5 (3.6)                         | 2 (25.0)                                     | 3 (2.3)                                               | 0.001           |

SLIR: Second line injectables resistant, TB: Tuberculosis, CXR: Chest x-ray, IQR: interquartile range

\*p-value for the association of clinical factor with heteroresistance, using chi-squared test for categorical variables and the Wilcoxon rank-sum to compare median age

<sup>^</sup>Highest pre-treatment smear grade

**Table S5. Clinical and demographic characteristics of 105 patients treated for Pre-XDR TB in the Philippines, 2013-2016**

|                                                 | <b>Total, n<br/>(%)<br/>N = 105</b> | <b>Heteroresistance,<br/>n (%)<br/>n = 31</b> | <b>No<br/>heteroresistance,<br/>n (%)<br/>n = 74</b> | <b>p-value*</b> |
|-------------------------------------------------|-------------------------------------|-----------------------------------------------|------------------------------------------------------|-----------------|
| <b>Clinical and demographic characteristics</b> |                                     |                                               |                                                      |                 |
| Age, median (IQR)                               | 39 (28-54)                          | 49 (34-58)                                    | 35 (24-54)                                           | 0.01            |
| Female                                          | 36 (34.3)                           | 11 (35.5)                                     | 25 (33.8)                                            | 0.87            |
| Body mass index                                 |                                     |                                               |                                                      |                 |
| Normal                                          | 31 (29.5)                           | 7 (22.6)                                      | 24 (32.4)                                            | 0.28            |
| Underweight                                     | 61 (58.1)                           | 22 (71.0)                                     | 39 (52.7)                                            |                 |
| Overweight                                      | 10 (9.5)                            | 1 (3.2)                                       | 9 (12.2)                                             |                 |
| Obese                                           | 3 (2.9)                             | 1 (3.2)                                       | 2 (2.7)                                              |                 |
| National Capital Region                         | 36 (34.3)                           | 10 (32.3)                                     | 26 (35.1)                                            | 0.78            |
| Baseline CXR                                    |                                     |                                               |                                                      |                 |
| Cavitary                                        | 24 (22.9)                           | 4 (12.9)                                      | 20 (27.0)                                            | 0.15            |
| Non-cavitary                                    | 47 (44.8)                           | 18 (58.1)                                     | 29 (39.2)                                            |                 |
| Unknown                                         | 34 (32.4)                           | 9 (29.0)                                      | 25 (33.8)                                            |                 |
| Smear grade <sup>^</sup>                        |                                     |                                               |                                                      |                 |
| Negative or scanty                              | 24 (22.9)                           | 4 (12.9)                                      | 20 (27.0)                                            | 0.07            |
| (1+)                                            | 23 (21.9)                           | 6 (19.4)                                      | 17 (23.0)                                            |                 |
| (2+)                                            | 19 (18.1)                           | 10 (32.3)                                     | 9 (12.2)                                             |                 |
| (3+)                                            | 39 (37.1)                           | 11 (35.5)                                     | 28 (37.8)                                            |                 |
| Previous TB treatment                           | 102 (97.1)                          | 30 (96.8)                                     | 72 (97.3)                                            | 0.88            |
| <b>Heteroresistance</b>                         |                                     |                                               |                                                      |                 |
| Macro (>10%)                                    | 21 (20.0)                           | 21 (67.7)                                     | -                                                    |                 |
| Micro (≤10%)                                    | 7 (6.7)                             | 7 (22.6)                                      | -                                                    |                 |
| Rare                                            | 3 (2.9)                             | 3 (9.7)                                       | -                                                    |                 |
| Heteroresistance to:                            |                                     |                                               |                                                      |                 |
| Fluoroquinolones                                | 26 (24.8)                           | 26 (83.9)                                     | -                                                    |                 |
| Second-line injectables                         | 2 (1.9)                             | 2 (6.5)                                       | -                                                    |                 |
| Isoniazid                                       | 2 (1.9)                             | 2 (6.5)                                       | -                                                    |                 |
| Rifampicin                                      | 1 (1.0)                             | 1 (3.2)                                       | -                                                    |                 |
| Streptomycin                                    | 4 (3.8)                             | 4 (12.9)                                      | -                                                    |                 |
| >1 resistant population                         | 5 (4.8)                             | 3 (9.7)                                       | 2 (2.7)                                              | 0.13            |

XDR: Extensively drug-resistant, TB: Tuberculosis, CXR: Chest x-ray, IQR: interquartile range

\*p-value for the association of clinical factor with heteroresistance, using chi-squared test for categorical variables and the Wilcoxon rank-sum to compare median age

<sup>^</sup>Highest pre-treatment smear grade



**Table S6. Distribution of degree of heteroresistance based on the phenotypic susceptibility test**

|              | Total of each degree of heteroresistance | Phenotypic resistance<br>n (%) | Phenotypic susceptibility<br>n (%) |
|--------------|------------------------------------------|--------------------------------|------------------------------------|
| <b>Macro</b> | 43                                       | 39 (65.0)                      | 4 (44.4)                           |
| <b>Micro</b> | 13                                       | 11 (18.3)                      | 2 (22.2)                           |
| <b>Rare</b>  | 13                                       | 10 (16.7)                      | 3 (33.3)                           |
| <b>Total</b> | 69                                       | 60                             | 9                                  |

**Figure S1. Frequency of heteroresistance by drug class/target**

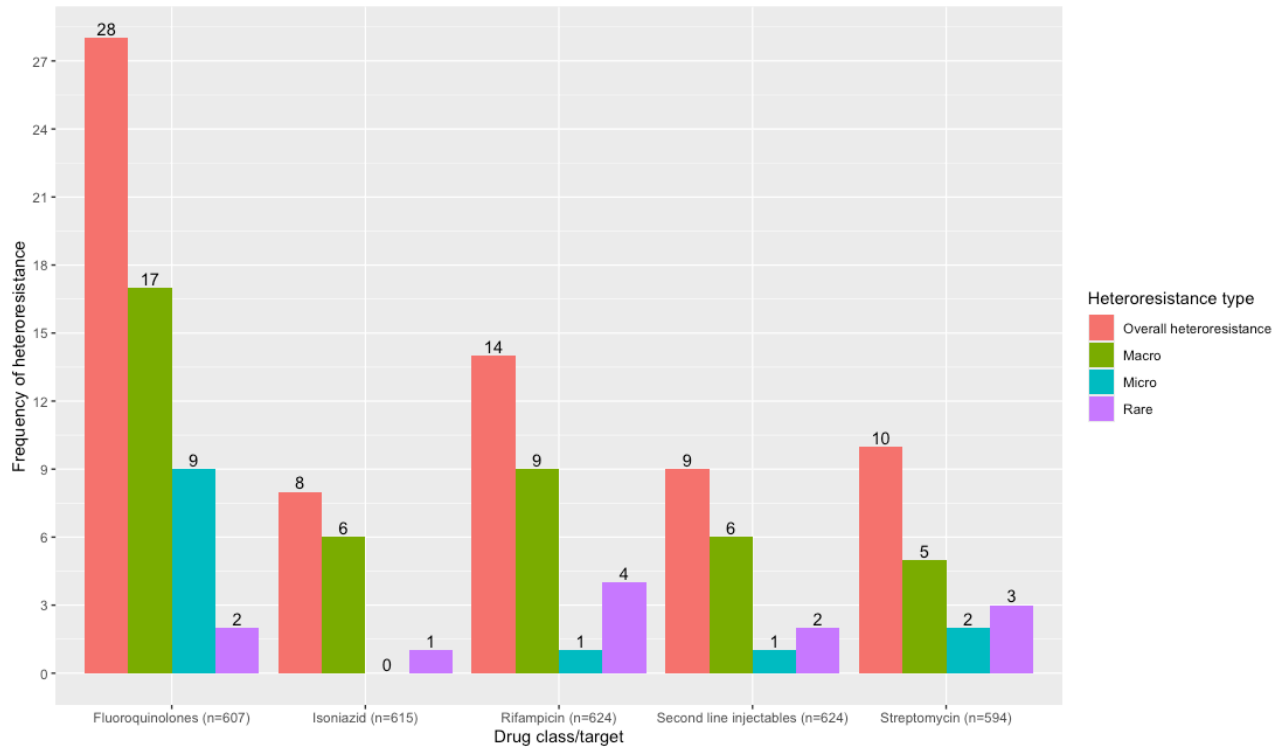

**Table S7. Hazard of unfavorable outcome associated with heteroresistance in multiple imputation analysis**

|                         | N   | Unadjusted Hazard Ratio (95% CI) | Adjusted Hazard Ratio* (95% CI) | P-value* |
|-------------------------|-----|----------------------------------|---------------------------------|----------|
| <b>Heteroresistance</b> |     |                                  |                                 |          |
| <b>MDR TB</b>           | 379 | 1.26 (0.31, 5.23)                | 1.56 (.35, 6.88)                | 0.59     |
| <b>MDR plus SLIR</b>    | 140 | 0.83 (0.11, 6.24)                | 1.14 (0.13, 9.87)               | 0.90     |
| <b>Pre-XDR</b>          | 105 | 0.74 (0.29, 1.87)                | 0.64 (0.24, 1.74)               | 0.39     |

\* Adjusted for known demographic and clinical risk factors with significance p=0.2 (age, region of the Philippines, cavitory chest X-ray, treatment history, body mass index).

MDR: multi-drug resistant; SLIR: second-line injectable resistant; XDR: extensively drug resistant.
